# Supplementary material for: A prospective comparison study of subcutaneous and intramuscular testosterone injections in transgender male adolescents
Source: publisher site journal article supplement (doi:10.1515/jpem-2023-0237), 2023-10-03
Supplement: Supplementary file 1 [file j_jpem-2023-0237_suppl_001.docx]

**SUPPLEMENTAL DATA**

**Supplementary Table S1**. Baseline characteristics of randomized participants

|  | ***Total (N=18)*** | ***Subcutaneous (n=9)*** | ***Intramuscular (n=9)*** | ***p-value*** |
| --- | --- | --- | --- | --- |
| **State, n (%)** |  |  |  |  |
| Oregon | 16 (89%) | 8 (89%) | 8 (89%) | 1.00 |
| Washington | 2 (11%) | 1 (11%) | 1 (11%) |  |
| **Age (years), median (IQR)** | 15.00 (14.00-17.00) | 15.00 (14.00-15.00) | 16.00 (15.00-17.00) | 0.17 |
| **Weight (kg), median (IQR)** | 70.15 (56.80-89.80) | 67.40 (55.20-92.80) | 72.90 (58.50-74.80) | 0.89 |
| **Weight percentile, median (IQR)** | 91.00 (57.00-97.00) | 87.00 (54.00-98.00) | 94.00 (77.00-94.00) | 0.92 |
| **BMI (kg/m2), median (IQR)** | 26.50 (20.60-34.70) | 25.40 (20.10-34.70) | 27.60 (22.90-29.60) | 0.83 |
| **BMI Z-score, median (IQR)** | 1.26 (-0.08-1.99) | 1.09 (-0.06-2.11) | 1.34 (-0.15-1.78) | 0.90 |
| **Ethnicity, n (%)** |  |  |  |  |
| Hispanic or Latino | 3 (17%) | 1 (11%) | 2 (22%) | 0.53 |
| NOT Hispanic or Latino | 15 (83%) | 8 (89%) | 7 (78%) |  |
| **Race, n (%)** |  |  |  |  |
| Caucasian | 14 (78%) | 7 (78%) | 7 (78%) | 0.51 |
| Hispanic or Latino | 3 (17%) | 1 (11%) | 2 (22%) |  |
| Unknown / Not reported | 1 (6%) | 1 (11%) | 0 (0%) |  |
| **Follow-up participation, n (%)** |  |  |  |  |
| Visit 2 (3 months) | 13 (72%) | 7 (78%) | 6 (67%) |  |
| Visit 3 (6 months) | 11 (61%) | 6 (67%) | 5 (56%) |  |
| Visit 4 (9 months, optional cross over) | 3 (17%) | 1 (11%) | 2 (22%) |  |

Abbreviations: BMI, body mass index; IQR, interquartile range; kg, kilogram

Missing values: weight percentile, n=1

|  |  | ***Na*** | ***Total*** | ***nb*** | ***Subcutaneous (SQ)*** | ***nc*** | ***Intramuscular (IM)*** | ***p-valued*** |
| --- | --- | --- | --- | --- | --- | --- | --- | --- |
| Visit 2  (3 months) | Total testosterone (trough) | 12 | 117.0 (92.0-131.0) | 7 | 119.0 (79.0-188.0) | 5 | 112.0 (103.0-130.0) | 0.8763 |
| Total testosterone (peak) | 8 | 156.0 (111.0-363.0) | 4 | 111.5 (93.5-156.0) | 4 | 363.0 (235.5-534.5) | 0.1143 |
| Visit 3  (6 months) | Total testosterone (trough) | 11 | 235.0 (119.0-364.0) | 6 | 177.0 (110.0-245.0) | 5 | 364.0 (210.0-364.0) | 0.1147 |
| Total testosterone (peak) | 4 | 171.5 (111.0-287.0) | 3 | 137.0 (85.0-206.0) | 1 | 368.0 (-) | - |

**Supplementary Table S2**. Median trough and peak total testosterone (ng/dL) according to injection group for randomized participants

Data are presented as median and interquartile range (IQR)

Abbreviations: SQ, subcutaneous; IM, intramuscular

a Total N with measurements

b Subjects with measurements in SQ group

c Subjects with measurements in IM group

d p-value from Mann-Whitney U test for difference in measures between injection groups. Tests were not performed if group n<3.

**Supplementary Table S3.** Median free testosterone (ng/dL) according to injection group for randomized participants

|  |  | ***Na*** | ***Total*** | ***nb*** | ***Subcutaneous (SQ)*** | ***nc*** | ***Intramuscular (IM)*** | ***p-valued*** |
| --- | --- | --- | --- | --- | --- | --- | --- | --- |
| Visit 2  (3 months) | Free testosterone (trough) | 16 | 19.1 (16.3-24.7) | 10 | 21.3 (18.8-25.6) | 6 | 16.3 (12.0-18.0) | 0.1000 |
| Free testosterone (peak) | 2 | 48.7 (42.9-54.4) | 0 | - | 2 | 48.7 (42.9-54.4) | - |
| Visit 3  (6 months) | Free testosterone (trough) | 14 | 37.3 (22.9-54.9) | 9 | 36.1 (22.9-39.5) | 5 | 51.8 (23.0-66.5) | 0.4600 |
| Free testosterone (peak) | 1 | 20.0 (-) | 1 | 20.0 (-) | 0 | - | - |

Data are presented as median and interquartile range (IQR)

Abbreviations: SQ, subcutaneous; IM, intramuscular

a Total N with measurements

b Subjects with measurements in SQ group

c Subjects with measurements in IM group

d p-value from Mann-Whitney U test for difference in measures between injection groups. Tests were not performed if group n<3.

**Supplementary Table S4**. Median masculinization scores according to injection group for randomized participants

|  | ***Na*** | ***Total*** | ***nb*** | ***Subcutaneous (SQ)*** | ***nc*** | ***Intramuscular (IM)*** | ***p-valued*** |
| --- | --- | --- | --- | --- | --- | --- | --- |
| Visit 2 (3 months) | 13 | 17.0 (13.0-19.0) | 7 | 13.0 (9.0-18.0) | 6 | 19.0 (16.0-21.0) | 0.0938 |
| Visit 3 (6 months) | 11 | 19.0 (16.0-23.0) | 6 | 18.0 (16.0-23.0) | 5 | 21.0 (18.0-23.0) | 0.5108 |
| Visit 4 (9 months, optional cross over) | 3 | 20.0 (18.0-28.0) | 1 | 20.0 (20.0-20.0) | 2 | 23.0 (18.0-28.0) | - |

Data are presented as median and interquartile range (IQR)

Abbreviations: SQ, subcutaneous; IM, intramuscular

a Total N with measurements

b Subjects with measurements in SQ group

c Subjects with measurements in IM group

d p-value from Mann-Whitney U test for difference in measures between injection groups. Tests were not performed if group n<3.

**Supplementary Table S5.** Median total PedsQL™ scores according to injection group for randomized participants

|  | ***Na*** | ***Total*** | ***nb*** | ***Subcutaneous (SQ)*** | ***nc*** | ***Intramuscular (IM)*** | ***p-valued*** |
| --- | --- | --- | --- | --- | --- | --- | --- |
| Visit 1 (baseline) | 17 | 64.13 (61.96-76.09) | 9 | 68.48 (61.96-83.70) | 8 | 62.50 (58.15-66.08) | 0.18 |
| Visit 2 (3 months) | 13 | 60.87 (51.09-68.48) | 7 | 67.39 (45.65-90.22) | 6 | 60.33 (53.41-61.96) | 0.78 |
| Visit 3 (6 months) | 11 | 59.78 (54.35-78.26) | 6 | 60.87 (59.78-78.26) | 5 | 56.52 (54.35-60.87) | 0.46 |
| Visit 4 (9 months, optional cross over) | 3 | 59.78 (42.39-77.17) | 1 | 59.78 (-) | 2 | 59.78 (42.39-77.17) | - |

Data are presented as median and interquartile range (IQR)

Abbreviations: SQ, subcutaneous; IM, intramuscular

a Total N with measurements

b Subjects with measurements in SQ group

c Subjects with measurements in IM group

d p-value from Mann-Whitney U test for difference in measures between injection groups. Tests were not performed if group n<3.
